# Supplementary material for: Non-Invasive and Label-Free On-Chip Impedance Monitoring of Heatstroke
Source: MDPI journal article supplement (doi:10.3390/bios13070686), 2023-06-27
Supplement: s1 [file s1]

# Non-Invasive and Label-Free On-Chip Impedance Monitoring of Heatstroke

Yueli Zhao <sup>1,2,3</sup>, Weihua Fan <sup>2</sup>, Anwei Liu <sup>3</sup>, Shihua Pan <sup>2,4</sup>, Chongxiao Xu <sup>3,5</sup>, Hailun Peng <sup>3,5</sup>, Bingling Yin <sup>1,3</sup>, Xiaodong Wang <sup>6</sup>, Jianhua Dong <sup>2</sup> and Zhiguo Pan <sup>1,3,5,\*</sup>

- <sup>1</sup> Guangzhou University of Chinese Medicine, Guangzhou 510006, China; 2020111187@stu.gzucm.edu.cn (Y.Z.); 20221111561@stu.gzucm.edu.cn (B.Y.)  
<sup>2</sup> Guangzhou Institute of Biomedicine and Health, Chinese Academy of Sciences, Guangzhou 510530, China; fan\_weihua@gibh.ac.cn (W.F.); 2020219451@stu.gzhmu.edu.cn (S.P.); dong\_jianhua@gibh.ac.cn (J.D.)  
<sup>3</sup> Department of Intensive Care Unit, General Hospital of Southern Theatre Command of PLA, Guangzhou 510000, China; anweiliu2014@163.com (A.L.); fanteny@tom.com (C.X.); 17825846221@163.com (H.P.)  
<sup>4</sup> Department of Biochemistry and Molecular Biology, GMU-GIBH Joint School of Life Sciences, Guangzhou Medical University, Guangzhou 511436, China  
<sup>5</sup> Southern Medical University, Guangzhou 510000, China  
<sup>6</sup> Engineering Research Center for Semiconductor Integrated Technology, Institute of Semiconductors, Chinese Academy of Sciences, Beijing 100083, China; xdwang@semi.ac.cn  
\* Correspondence: 13060686138@126.com; Tel.: +86-130-6068-6138

## Calculating values of TEER and $C_l$

As described in figure 3 in the context, the values of TEER and  $C_l$  can be calculated as following:

For no cells (Figure 3b) condition, the whole impedance can be seen as:

$$Z_0 = R_s - j \frac{1}{\omega C_{dl}} = Z_{0re} + jZ_{0im} \quad \text{Eq (S1)}$$

Where  $\omega$  represents angle frequency, and  $R_s$  represents the resistance of medium.

For monolayer HUVECs (Figure 3c) condition, the impedance is described as:

$$\begin{aligned} Z &= R_s + \frac{1}{\frac{1}{TEER} + j\omega C_l} \\ &= R_s + \frac{TEER}{1 + j\omega C_l \cdot TEER} \\ &= R_s + \frac{TEER}{1 + \omega^2 C_l^2 \cdot TEER^2} - j \frac{\omega C_l \cdot TEER^2}{1 + \omega^2 C_l^2 \cdot TEER^2} \\ &= Z_{re} + jZ_{im} \end{aligned} \quad \text{Eq (S2)}$$

Where the  $C_l$  is capacitance of cell-cell adhesion, and  $Z_{0re}$ ,  $Z_{0im}$ ,  $Z_{re}$  and  $Z_{im}$  are real and imagery of no cell and monolayer HUVECs respectively.

By combining eq(S1) and (S2), and supposing:

$$a = Z_{re} - Z_{0re} = \frac{TEER}{1 + \omega^2 C_l^2 \cdot TEER^2} \quad \text{Eq (S3)}$$

$$b = Z_{im} = \frac{\omega C_l \cdot TEER^2}{1 + \omega^2 C_l^2 \cdot TEER^2} \quad \text{Eq (S4)}$$

Combining eq (S3) and (S4), the values of TEER and  $C_l$  are calculated as:

$$\begin{aligned} TEER &= \frac{a^2 + b^2}{a} \\ C_l &= \frac{b}{\omega(a^2 + b^2)} \end{aligned}$$
